# Supplementary material for: Genetic analysis of low-grade adenosquamous carcinoma of the breast progressing to high-grade metaplastic carcinoma
Source: PubMed Central journal article supplement (PMC10564816; doi:10.1007/s10549-023-07078-9), 2023-08-31
Supplement: 10549_2023_7078_MOESM2_ESM.pdf [file 10549_2023_7078_MOESM2_ESM.pdf]

Fig. S1

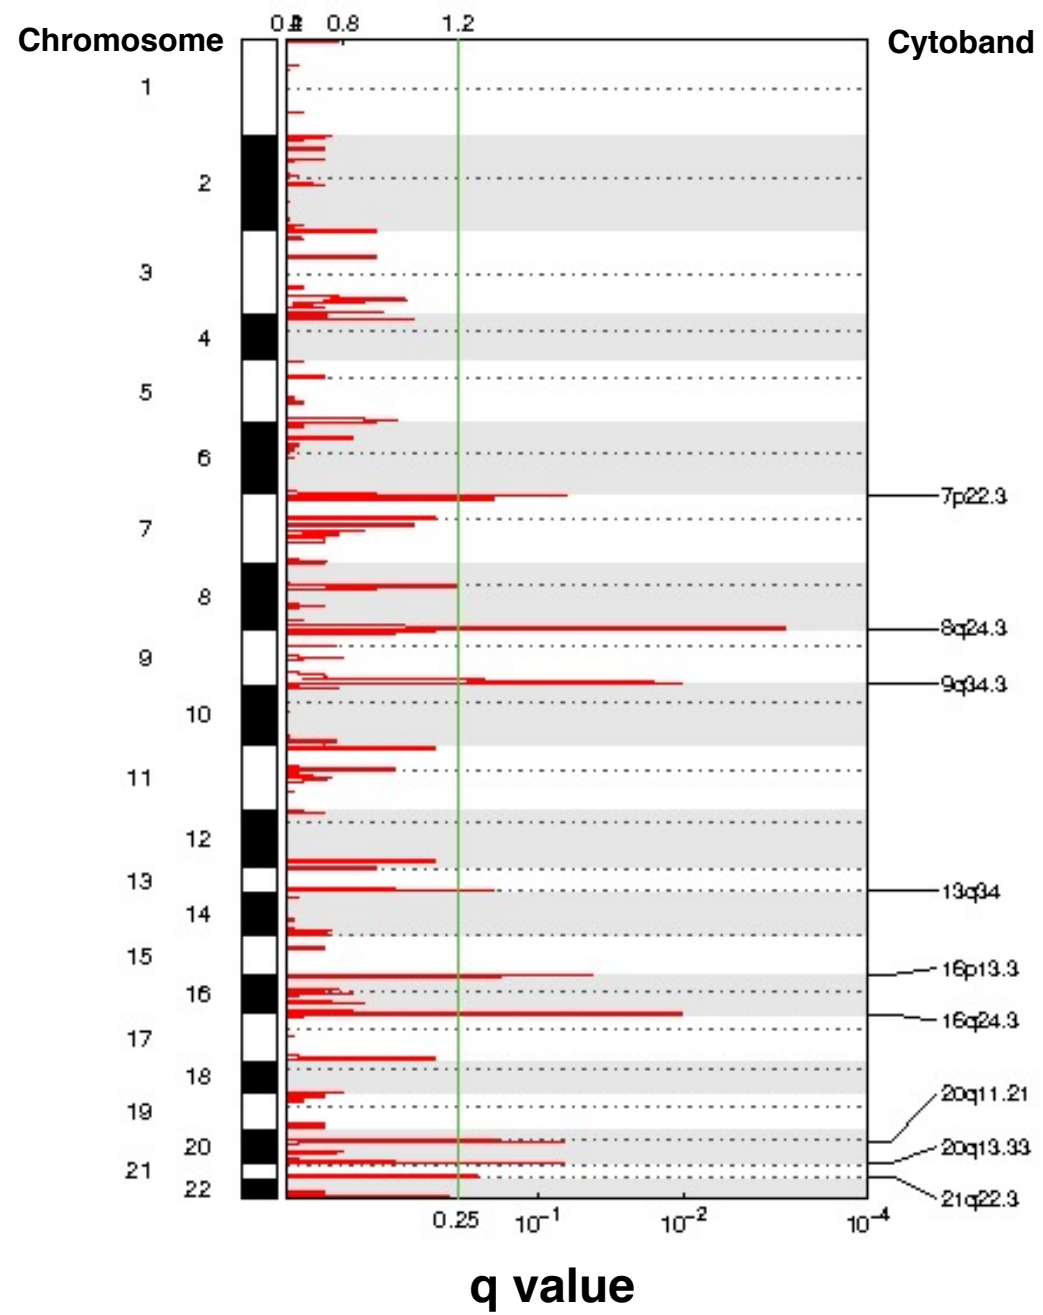

Fig. S2

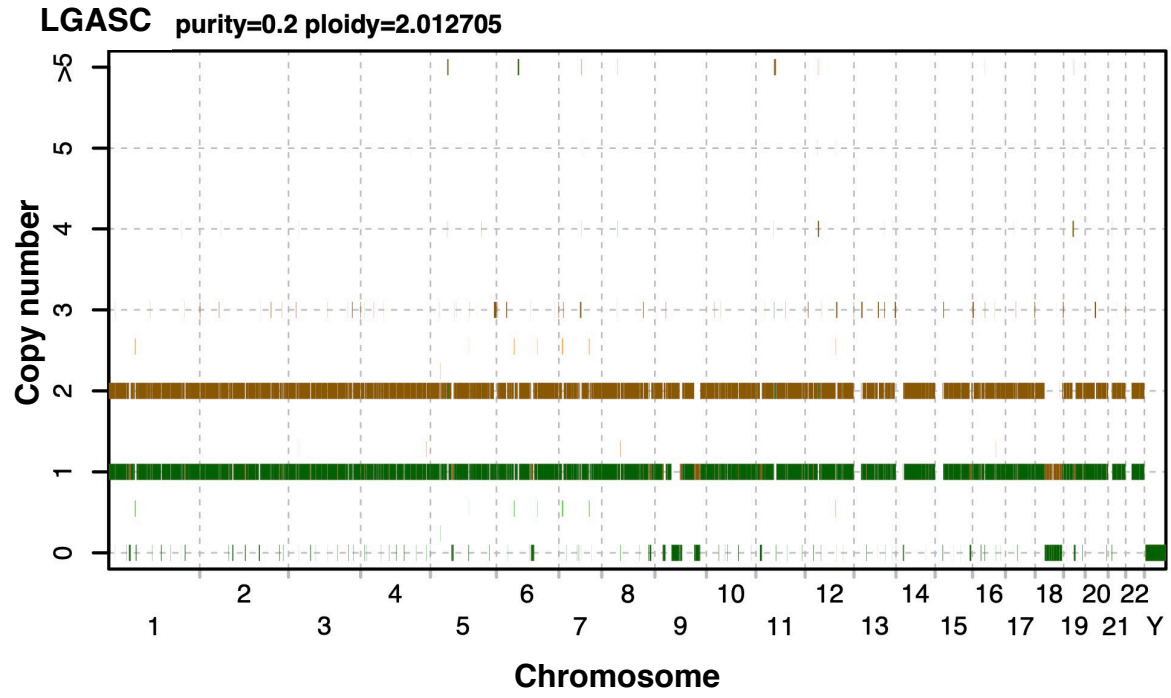

■ copy number                      ■ subclonal copy number  
■ minor allele copy number        ■ minor allele subclonal copy number

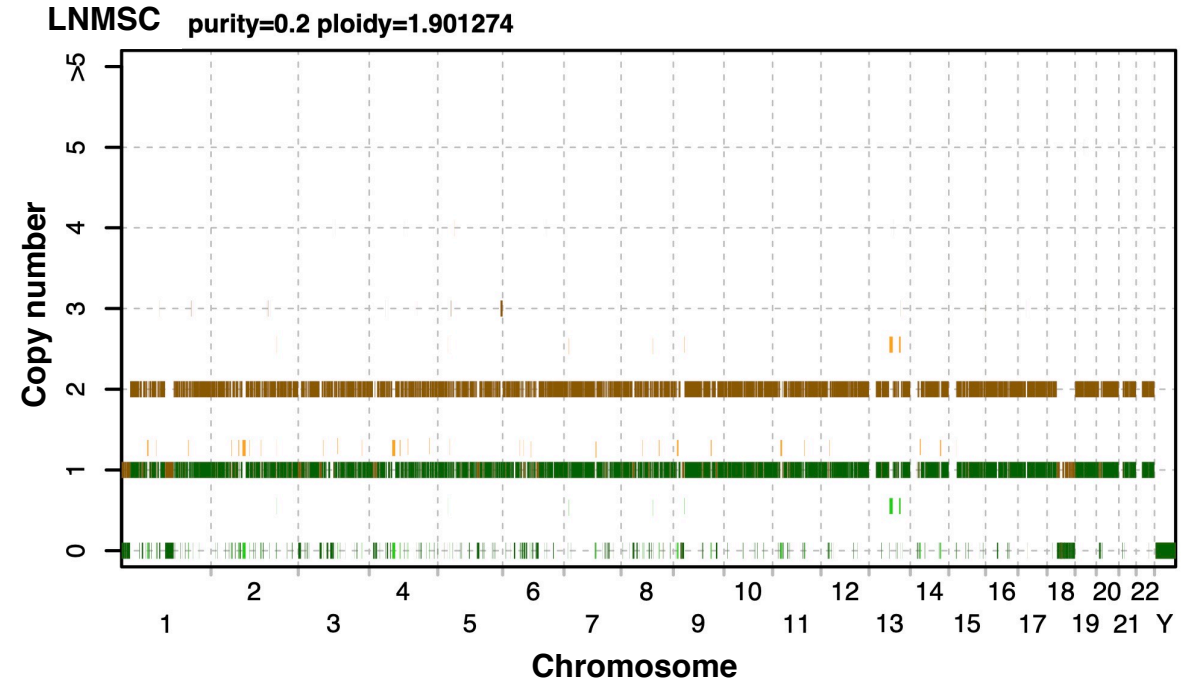

■ copy number                      ■ subclonal copy number  
■ minor allele copy number        ■ minor allele subclonal copy number
